# Supplementary material for: Upregulation of phosphatidylinositol glycan anchor biosynthesis class C is associated with unfavorable survival prognosis in patients with hepatocellular carcinoma
Source: PubMed Central journal article supplement — Oncol Lett. 2021 Jan 26;21(3):237. doi: 10.3892/ol.2021.12498 (PMC7856693; doi:10.3892/ol.2021.12498), 2021-01-26

Figure S1. Correlation between PIGC DNA methylation and mRNA expression. (A) Differential levels of DNA methylation were observed in the liver tumor compared with the healthy tissues. (B) Methylation and expression of the PIGC mRNA from The Cancer Genome Atlas-Liver Hepatocellular Carcinoma database. PIGC, phosphatidylinositol glycan anchor biosynthesis class C.

A [NM\\_002642](#)

[Download summary](#)

[NCBI Nucleotide](#)

 Tumor sample

 Normal sample

\*:p<0.05

\*\* :p<0.005

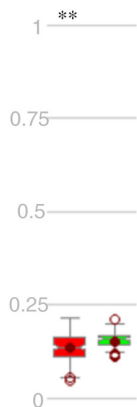

B

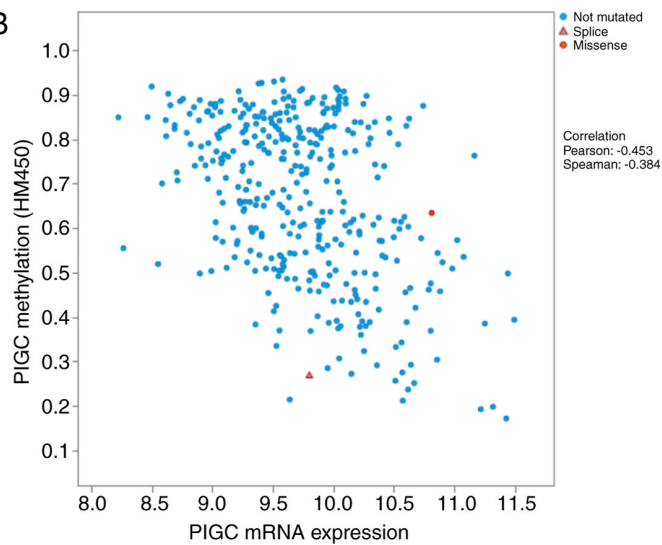

Figure S2. Survival of patients with HCC in relation to PIGC DNA methylation. (A) PIGC DNA methylation and OS. (B) PIGC DNA methylation and DFS. HCC, hepatocellular carcinoma; PIGC, phosphatidylinositol glycan anchor biosynthesis class C; OS, overall survival; DFS, disease-free survival.

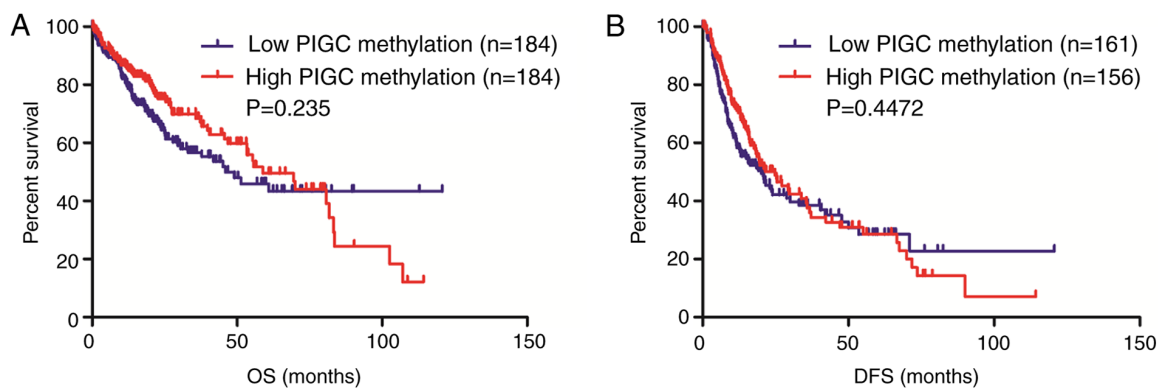

Figure S3. Significant proteins identified from the PPI network of PIGC. PPI, protein-protein interaction; PIGC, phosphatidylinositol glycan anchor biosynthesis class C.

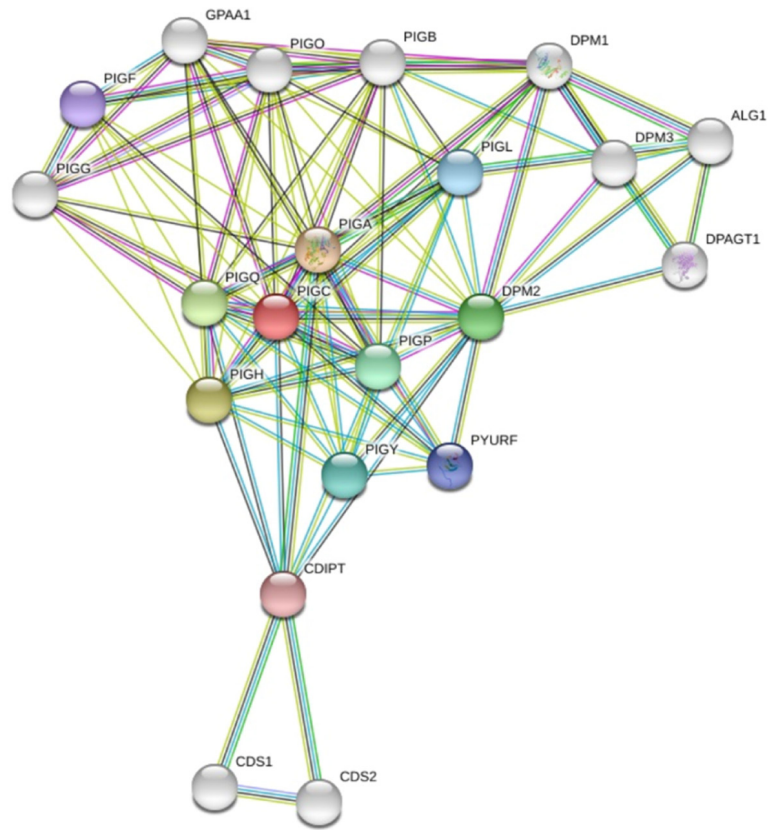

Supplement: Supplementary_Data.pdf [file Supplementary_Data.pdf]
